# Supplementary material for: En el umbral de la historiografía. Biografía, artistas, género
Source: MDPI journal article supplement (doi:10.3390/ijms24065560), 2009-01-01
Supplement: s1 [file s1]

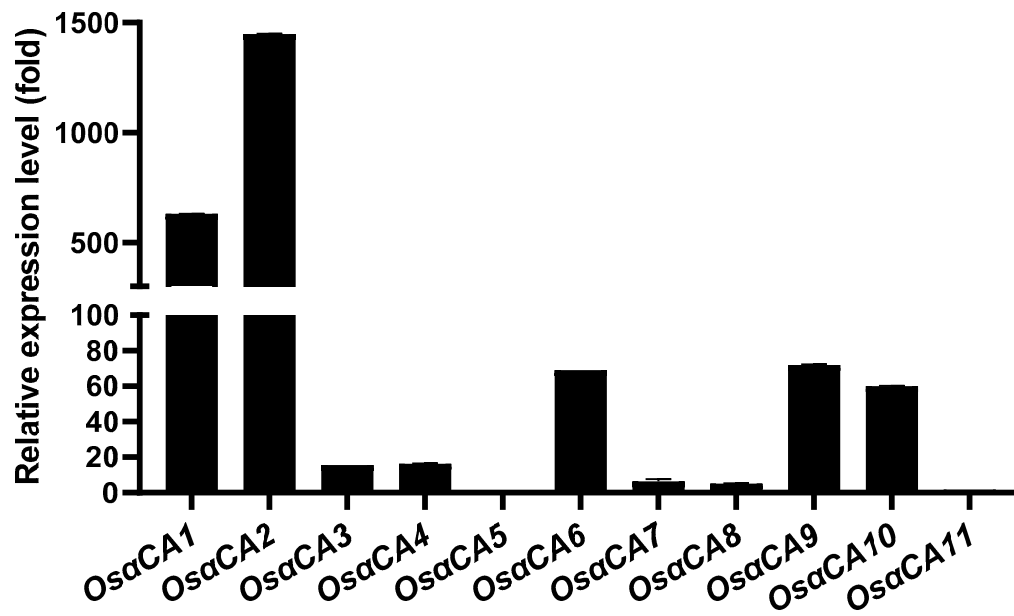

**Figure S1.** The relative expression levels of *OsaCAs* of rice in flag leaves. The total RNA of flag leaves was extracted to analyze the expression of alpha carbonic anhydrases of rice by qRT-PCR, consisting of *OsaCA1*, *OsaCA2*, *OsaCA3*, *OsaCA4*, *OsaCA5*, *OsaCA6*, *OsaCA7*, *OsaCA8*, *OsaCA9*, *OsaCA10* and *OsaCA11*, with *Ubiquitin* as control. Values are shown as means  $\pm$  SEM, where  $n = 3$ .

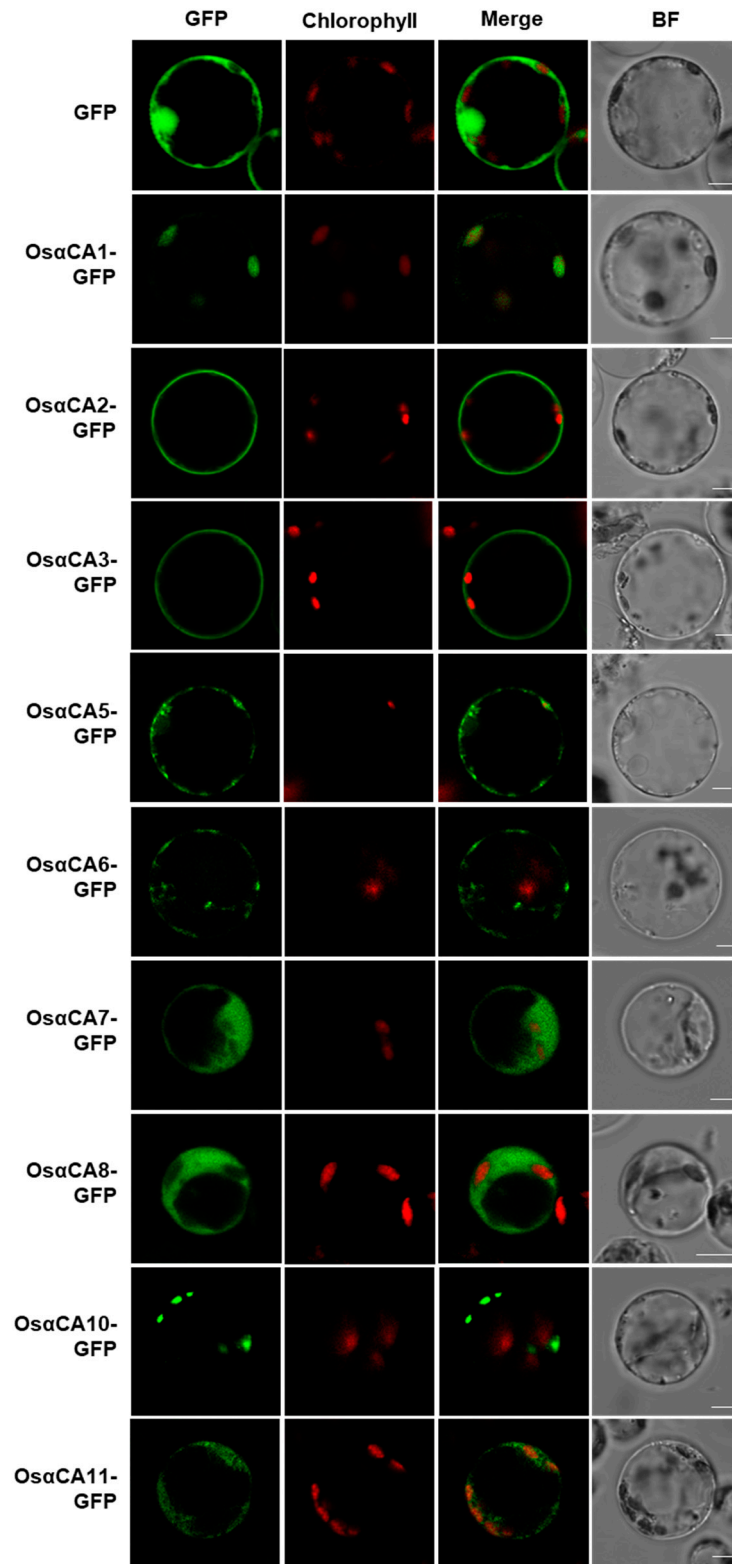

**Figure S2.** The subcellular localization of OsaCAs in rice. GFP—the view via GFP fluorescence; BF—the view via bright-field microscopy; chlorophyll—the view of chloroplast autofluorescence; and Merge—the merged view of GFP and chlorophyll. Scale bars: 5  $\mu$ m. Scale bars: 5  $\mu$ m.

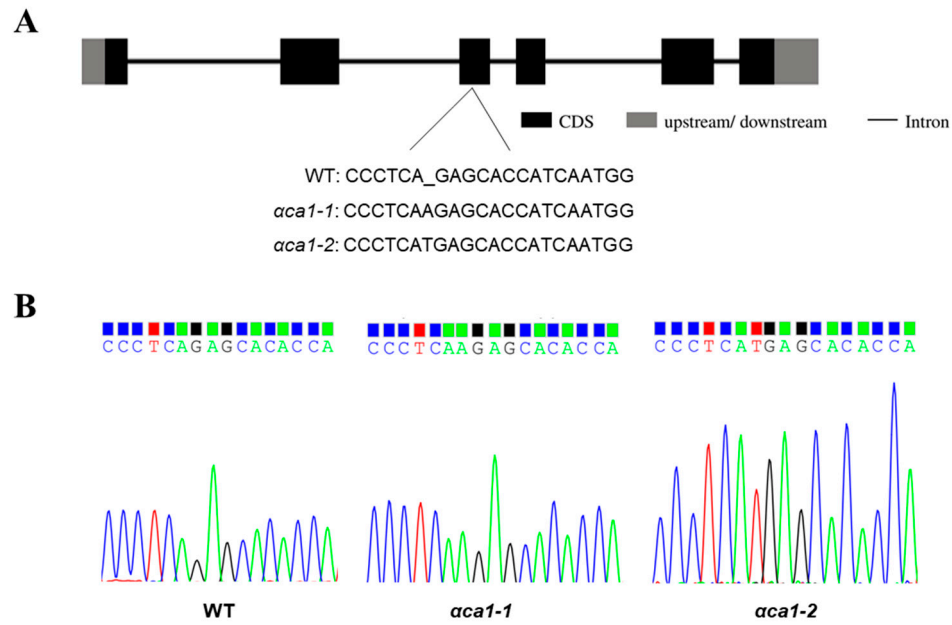

**Figure S3.** The gene structure and gene editing of *OsaCA1*. (A) The gene structure of *OsaCA1* and CRISPR/Cas9 editing method in *aca1* mutants. Input the CDS sequence and genomic sequence of *OsaCA1* in GSDS (<http://gsds.cbi.pku.edu.cn/>), and get the gene structure. The black rectangle represents the exons; the gray rectangle represents upstream or downstream; and the black line represents introns. B. The DNA sequencing of *OsaCA1* genome in *aca1* mutants.

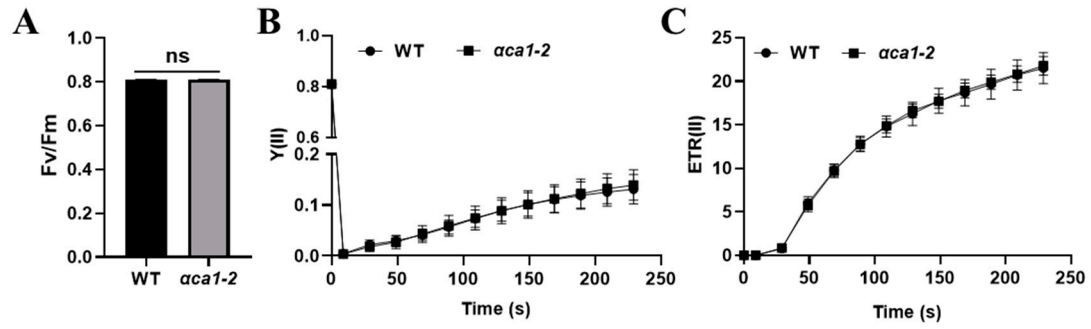

**Figure S4.** The activity of PSII in *aca1-2* was not affected. (A) The maximum photochemical quantum efficiency of PSII in WT and *aca1-2*. Values are shown as means  $\pm$  SEM determined via Student's *t*-test, where ns indicates no significant difference, and  $n \geq 10$ . (B–C) The slow chlorophyll fluorescence induction kinetics of WT and *aca1-2*. (B) Actual photochemical quantum efficiency; (C) electron transport rate. The first fully expanded leaves of 2-week-old seedlings were measured. All values are shown as means  $\pm$  SEM determined via Student's *t*-test, and  $n \geq 18$ . There were no significant differences between WT and *aca1-2*.

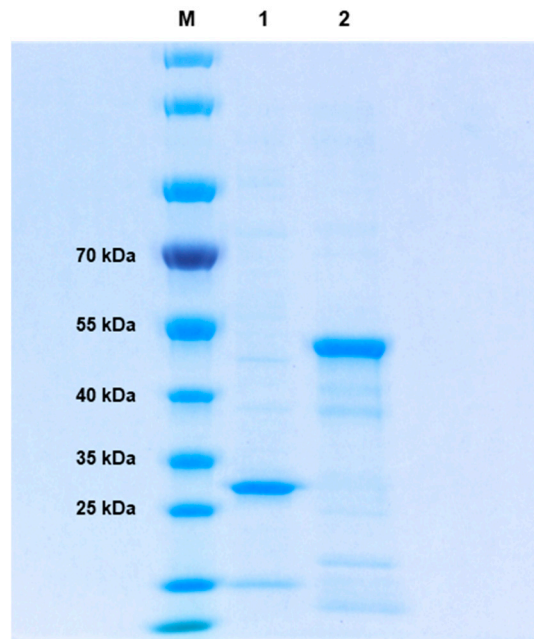

**Figure S5.** The purified protein with SDS-PAGE showed a bright target band. M represents the protein marker with the molecular weight at left. 1: GST protein; 2: GST-Os $\alpha$ CA1 fusion protein.

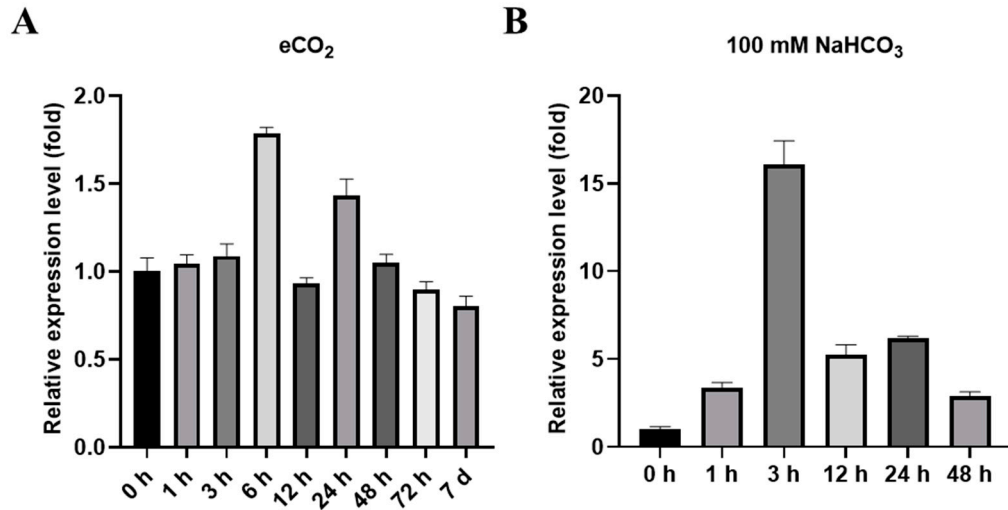

**Figure S6.** The expression of *OsaCA1* gene was induced by elevated CO<sub>2</sub> and HCO<sub>3</sub><sup>-</sup> treatment. (A) The relative expression of *OsaCA1* with elevated CO<sub>2</sub> treatment (eCO<sub>2</sub>). 10-day-old seedlings were treated with 1000 ppm CO<sub>2</sub> to detect the expression level of *OsaCA1* after 0 h, 1 h, 3 h, 6 h, 12 h, 24 h, 48 h, 72 h and 7 d. *Ubiquitin* was used as the control. Values are shown as means ± SEM, and *n* = 3. (B) The relative expression of *OsaCA1* with 100 mM NaHCO<sub>3</sub> treatment. 10-day-old seedlings were treated with 100 mM NaHCO<sub>3</sub> to detect the expression level of *OsaCA1* after 0 h, 1 h, 3 h, 12 h, 24 h and 48 h. *Ubiquitin* was the control. Values are shown as means ± SEM, and *n* = 3.

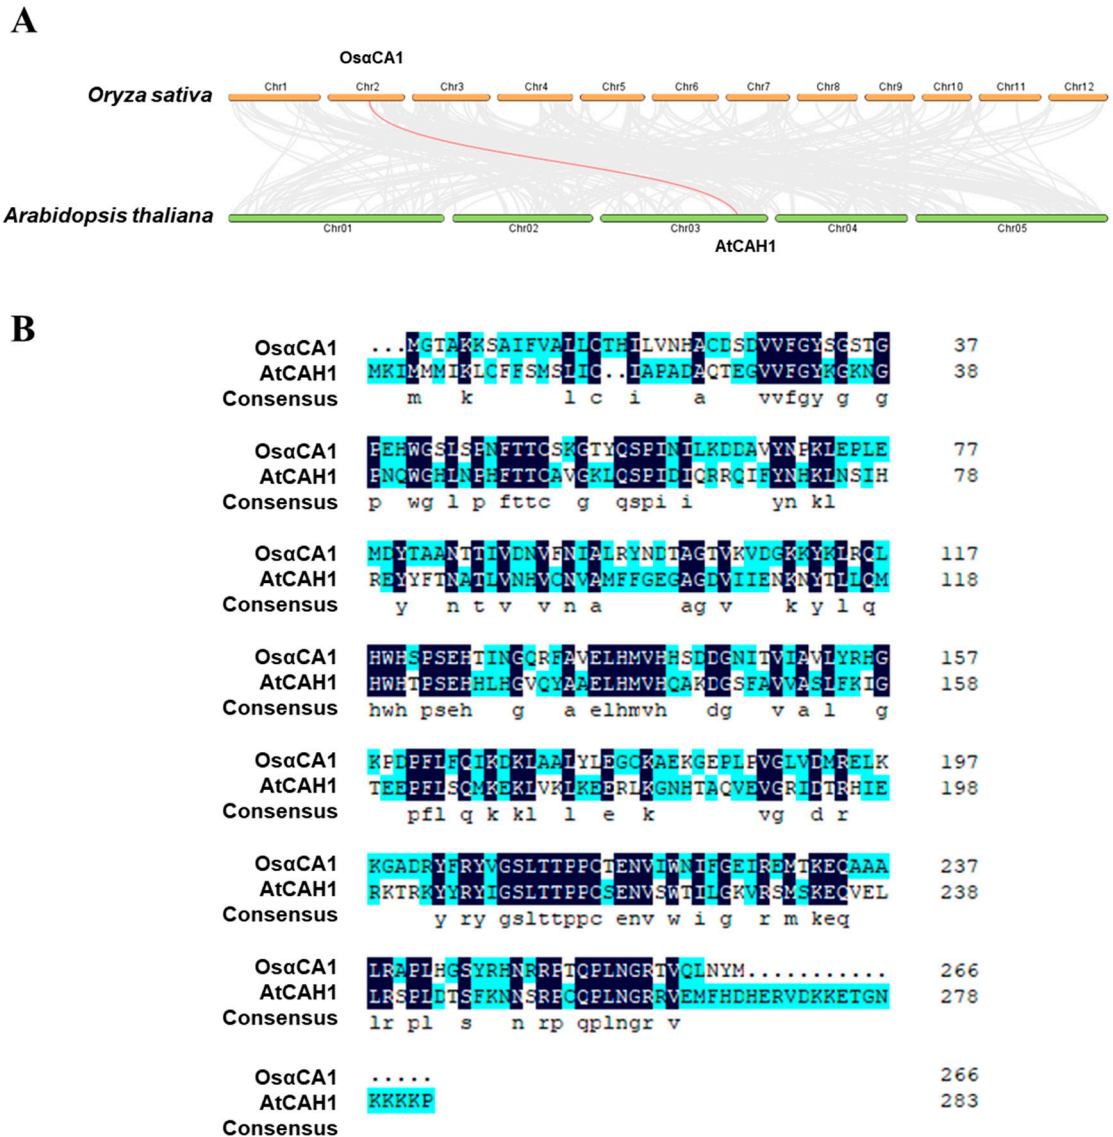

**Figure S7.** OsaCA1 was the homolog of AtCAH1 in rice. (A) The collinearity analysis of rice and Arabidopsis. Orange round-corner rectangles represent 12 chromosomes in rice; green round-corner rectangles represent 5 chromosomes in Arabidopsis; and the linked red line represents the collinearity of the two proteins. (B) The protein sequence alignment of OsaCA1 and AtCAH1. The protein sequences were aligned by DNAMAN, and different background colors represented different similarity levels.

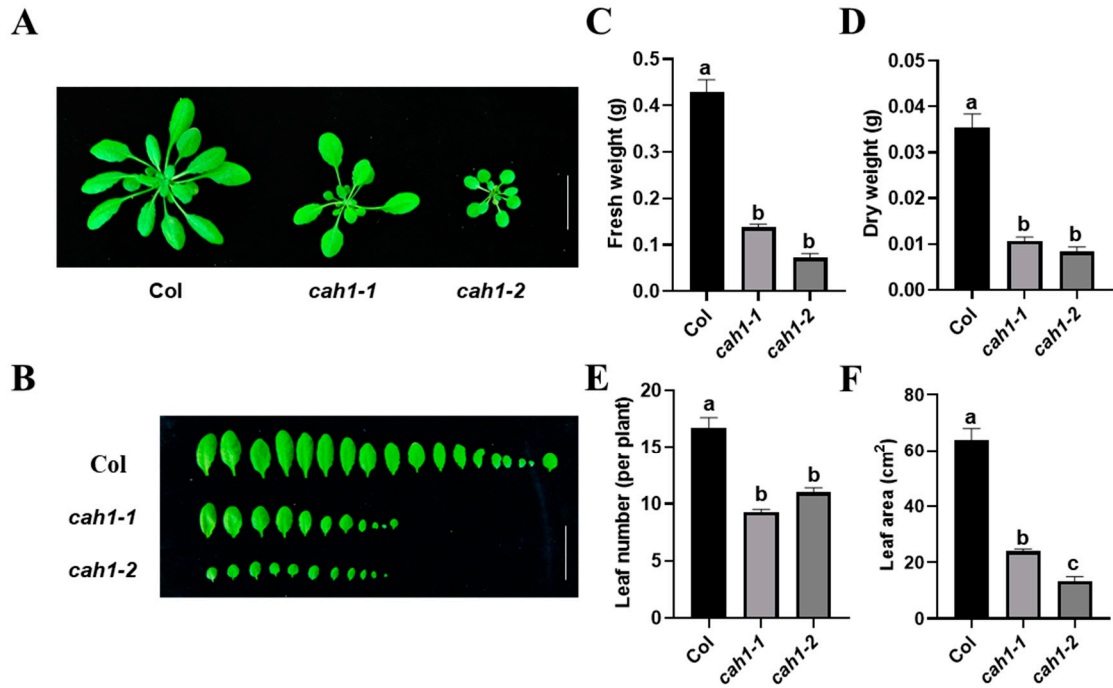

**Figure S8.** The knockout of *AtCAH1* inhibited plant growth. (A) The representative image of plant growth of Columbia (Col) and *cah1* mutants. Scale bar, 3 cm. (B) The representative image of rosette leaves of Col and *cah1* mutants. Scale bar, 3 cm. (C) Fresh weight of Col and *cah1* mutants. (D) Dry weight of Col and *cah1* mutants. (E) Leaf number per plant of Col and *cah1* mutants. (F) Leaf area of Col and *cah1* mutants. Values are shown as means  $\pm$  SEM determined via one-way ANOVA, where different letters indicate a significant difference,  $p < 0.05$ ,  $n = 9$ .



**Table S1.** Primers for qRT-PCR used in this study.

| Gene ID        | Primer name | Sequence (5' to 3')   |
|----------------|-------------|-----------------------|
| LOC_Os02g33030 | A1-RT-F     | CGACACCTCCATGCACCGAA  |
|                | A1-RT-R     | GGTGCGACCATTGAGTGGCT  |
| LOC_Os04g33660 | A2-RT-F     | TGCTCGAACGGAAAGCAGCA  |
|                | A2-RT-R     | GCAGCGCGACGTTGAAGATG  |
| LOC_Os08g32750 | A3-RT-F     | GCAGATGCACTGGCACACG   |
|                | A3-RT-R     | CCTGGTTCTGGGCGTTGAGG  |
| LOC_Os08g32780 | A4-RT-F     | CAGCTCCGGCAAATGCACTG  |
|                | A4-RT-R     | GGGTGGTGCCGATGGTGTAG  |
| LOC_Os08g32840 | A5-RT-F     | GGCGGGCTGGTGATTAACGG  |
|                | A5-RT-R     | GCGGTCTGGTTCTGGGTGTT  |
| LOC_Os08g36630 | A6-RT-F     | TCATCAACGGCACC GCCTAC |
|                | A6-RT-R     | CCTTCTTCTCGGCGCTCTCG  |
| LOC_Os08g36680 | A7-RT-F     | CCGAGATGGGCCAAGTGCAA  |
|                | A7-RT-R     | TAGCCGAGGTTGCGCATCAG  |
| LOC_Os09g28130 | A8-RT-F     | ACAACACCGCCTTGCACTGA  |
|                | A8-RT-R     | GGCCGTGCATTTGGTTCCAC  |
| LOC_Os09g28150 | A9-RT-F     | CACAAGGAGTGGGCCGTCTG  |
|                | A9-RT-R     | CCGGCCTTGTAGGCTTGCAT  |
| LOC_Os11g05520 | A10-RT-F    | GAGCAGGTCGCCCTCATCAC  |
|                | A10-RT-R    | TGCTGTTGGGCGGGTTGTAG  |
| LOC_Os12g05730 | A11-RT-F    | ACACGCTGGACCGCAACTAC  |
|                | A11-RT-R    | CCAGTGGATCGCCTGGAACC  |
| LOC_Os09g27930 | UBQ-RT-F    | ACCCTGGCTGACTACAACATC |
|                | UBQ-RT-R    | AGTTGACAGCCCTAGGGTG   |
| LOC_Os02g47020 | Prkase-RT-F | GAACAGGTCTCTTCCAAACT  |
|                | Prkase-RT-R | TTAAACTTTTGCCGCTTCAG  |
| LOC_Os04g16680 | SBPase-RT-F | TCTCATGTCTGCAAGTATGC  |
|                | SBPase-RT-R | TCGAATGCTACACTGAAACC  |
| LOC_Os01g64660 | FBPase-RT-F | CTCTTGAGGACGTGTTACAG  |
|                | FBPase-RT-R | GATCAAGTGTGAAGCCATTG  |

**Table S2.** Primers used for vector construction in this study.

| Gene ID        | Primer name | Sequence (5' to 3')                         | Purpose                                 |
|----------------|-------------|---------------------------------------------|-----------------------------------------|
| LOC_Os04g33660 | A2-GFP-F    | GACTCTAGAGGATCCATGGCAG<br>CTTCTCATGGAAAT    | Subcellular<br>localization<br>analysis |
|                | A2-GFP-R    | GCTCACCATGGATCCCGGGGAG<br>CTCCTCCTCTT       |                                         |
| LOC_Os08g32750 | A3-GFP-F    | GACTCTAGAGGATCCATGAGTA<br>CTTCAGCTCGCCG     |                                         |
|                | A3-GFP-R    | GCTCACCATGGATCCGTTGTTG<br>ATGAGAGGGAGAGGA   |                                         |
| LOC_Os08g32840 | A5-GFP-F    | GACTCTAGAGGATCCATGCATC<br>GCGCACGCC         |                                         |
|                | A5-GFP-R    | GCTCACCATGGATCCTACGTTG<br>ATCAGAGGGAGAGGAAT |                                         |
| LOC_Os08g36630 | A6-GFP-F    | GACTCTAGAGGATCCATGGGTT<br>CGACTCGCCTC       |                                         |
|                | A6-GFP-R    | GCTCACCATGGATCCATAGCGT<br>TTATGAGGGTAAGGC   |                                         |
| LOC_Os08g36680 | A7-GFP-F    | GACTCTAGAGGATCCATGCATT<br>CGAGTACTCGAGC     |                                         |
|                | A7-GFP-R    | GCTCACCATGGATCCGTCCTTCT<br>TAGGGTCTGGAATG   |                                         |
| LOC_Os09g28130 | A8-GFP-F    | GACTCTAGAGGATCCATGGCGC<br>CACATTTCAAGAA     |                                         |
|                | A8-GFP-R    | GCTCACCATGGATCCAACCTTCA<br>AAGTACCTCACAATTC |                                         |
| LOC_Os11g05520 | A10-GFP-F   | GACTCTAGAGGATCCATGGCGC<br>AGATGGAGTTC       |                                         |
|                | A10-GFP-R   | GCTCACCATGGATCCGACCTTG<br>AAGGAGATGGTGC     |                                         |
| LOC_Os12g05730 | A11-GFP-F   | GACTCTAGAGGATCCATGGTGT<br>CTCTCCGCGC        |                                         |
|                | A11-GFP-R   | GCTCACCATGGATCCCTTGGCG<br>AATTCCTGGAAG      |                                         |
| LOC_Os02g33030 | A1-GFP-F    | GACTCTAGAGGATCCATGGGGA<br>CTGCTAAGAAAAGTG   | Protein<br>purification                 |
|                | A1-GFP-R    | GCTCACCATGGATCCCATGTAA<br>TTGAGCTGCACGGT    |                                         |
|                | SP-GFP-R    | GCTCACCATGGATCCTGCATGG<br>TTCACAAGAATGT     |                                         |
|                | CA-GFP-F    | GACTCTAGAGGATCCATGTGTG<br>ACAGTGATGTGGTA    |                                         |
|                | GST-A1-F    | GTTCCGCGTGGATCCATGGGGA<br>CTGCTAAGAAAAGTG   |                                         |
|                | GST-A1-R    | TCGACCCGGGAATTCTTACATG<br>TAATTGAGCTGCACG   |                                         |
